# Supplementary material for: Co-delivery of cisplatin and paclitaxel by folic acid conjugated amphiphilic PEG-PLGA copolymer nanoparticles for the treatment of non-small lung cancer
Source: PubMed Central journal article supplement (PMC4747216; doi:10.18632/oncotarget.6243), 2015-10-26
Supplement: oncotarget-06-42150-s001.pdf [file oncotarget-06-42150-s001.pdf]

# Co-delivery of cisplatin and paclitaxel by folic acid conjugated amphiphilic PEG-PLGA copolymer nanoparticles for the treatment of non-small lung cancer

## Supplementary Material

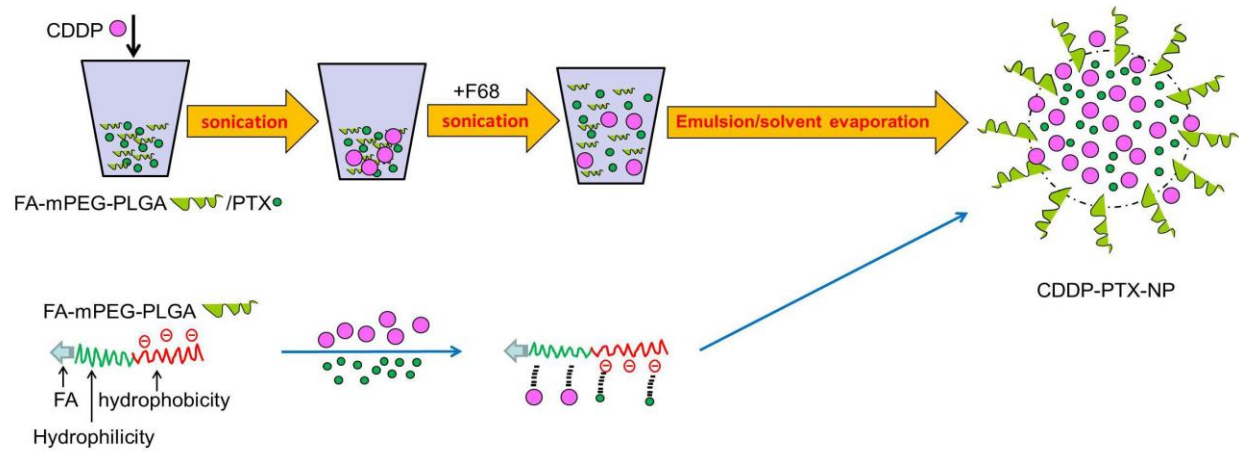

Supplementary **Scheme 1**. Schematic illustrations of antitumor drug loading.
